# Supplementary material for: Structure and Chemical Organization in Damselfly Calopteryx haemorrhoidalis Wings: A Spatially Resolved FTIR and XRF Analysis with Synchrotron Radiation
Source: PubMed Central journal article supplement (PMC5976759; doi:10.1038/s41598-018-26563-6), 2018-05-30
Supplement: 41598_2018_26563_MOESM1_ESM.pdf [file 41598_2018_26563_MOESM1_ESM.pdf]

## SUPPLEMENTARY INFORMATION

### Structure and Chemical Organization in Damselfly *Calopteryx haemorrhoidalis* Wings: A Spatially Resolved FTIR and XRF Analysis with Synchrotron Radiation

Susan Stuhr<sup>1</sup>, Vi Khanh Truong<sup>2</sup>, Jitraporn Vongsvivut<sup>3</sup>, Tobias Senkbeil<sup>1</sup>, Yang Yang<sup>4</sup>, Mohammad Al Kobaisi<sup>2</sup>, Vladimir A. Baulin<sup>5</sup>, Marco Werner<sup>5</sup>, Sergey Rubanov<sup>6</sup>, Mark J. Tobin<sup>3</sup>, Peter Cloetens<sup>4</sup>, Axel Rosenhahn<sup>1</sup>, Robert N. Lamb<sup>7</sup>, Pere Luque<sup>8</sup>, Richard Marchant<sup>9</sup> & Elena P. Ivanova<sup>2,10\*</sup>

<sup>1</sup>Analytical Chemistry – Biointerfaces, Ruhr-University Bochum, Universitätsstraße 150, 44780 Bochum, Germany

<sup>2</sup>School of Science, Faculty of Science, Engineering and Technology, Swinburne University of Technology, PO Box 218, Hawthorn, Victoria 3122, Australia

<sup>3</sup>Infrared Microspectroscopy Beamline, Australian Synchrotron, 800 Blackburn Road, Clayton, Victoria 3168, Australia

<sup>4</sup>European Synchrotron Radiation Facility, 71, avenue des Martyrs, CS 40220, 38043 Grenoble Cedex, France

<sup>5</sup>Departament d'Enginyeria Química, Universitat Rovira i Virgili, 26 Av. dels Països Catalans, 43007 Tarragona, Spain

<sup>6</sup>Advanced Microscopy Facility, Bio21 Institute, University of Melbourne, Parkville, Victoria 3010, Australia

<sup>7</sup>School of Chemistry, University of Melbourne, Parkville, Victoria 3010, Australia

<sup>8</sup>Museu de les Terres de l'Ebre, Gran Capità, 34, 43870 Amposta, Spain

<sup>9</sup>Melbourne Museum, 11 Nicholson St, Carlton, Victoria 3053, Australia

<sup>10</sup> School of Science, RMIT University, Melbourne, Victoria 3001, Australia

E-mail: [elena.ivanova@rmit.edu.au](mailto:elena.ivanova@rmit.edu.au)

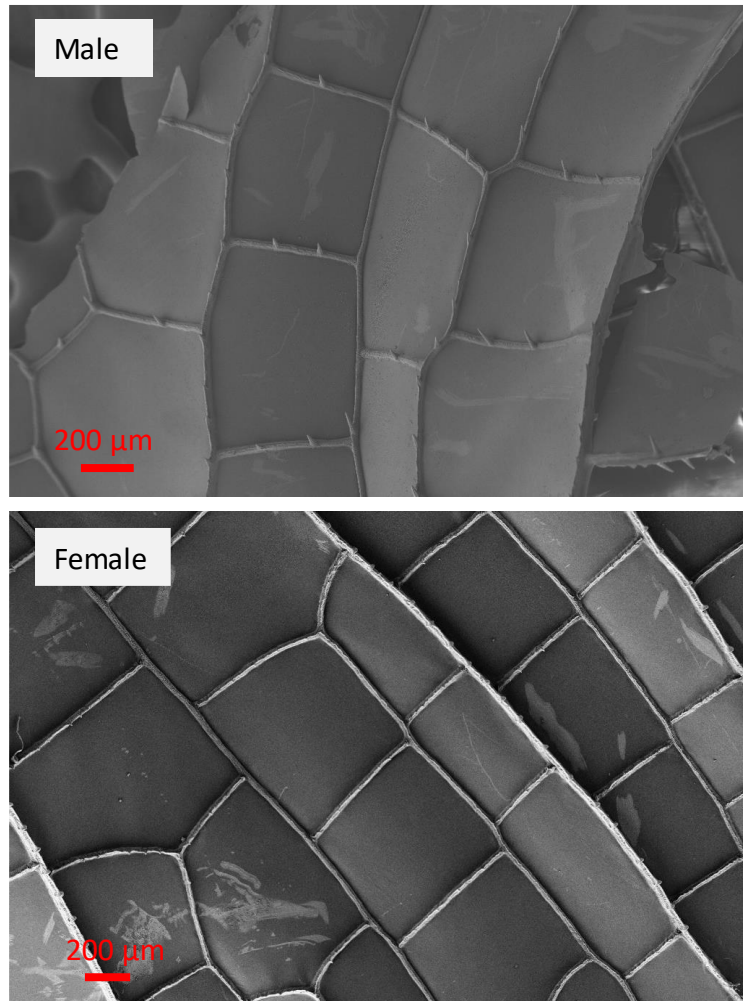

**Figure S1.** Overview of the male and female *Calopteryx haemorrhoidalis* wing membranes.

Scanning electron micrographs showing the veins and hairs on the membrane of male and female wings.

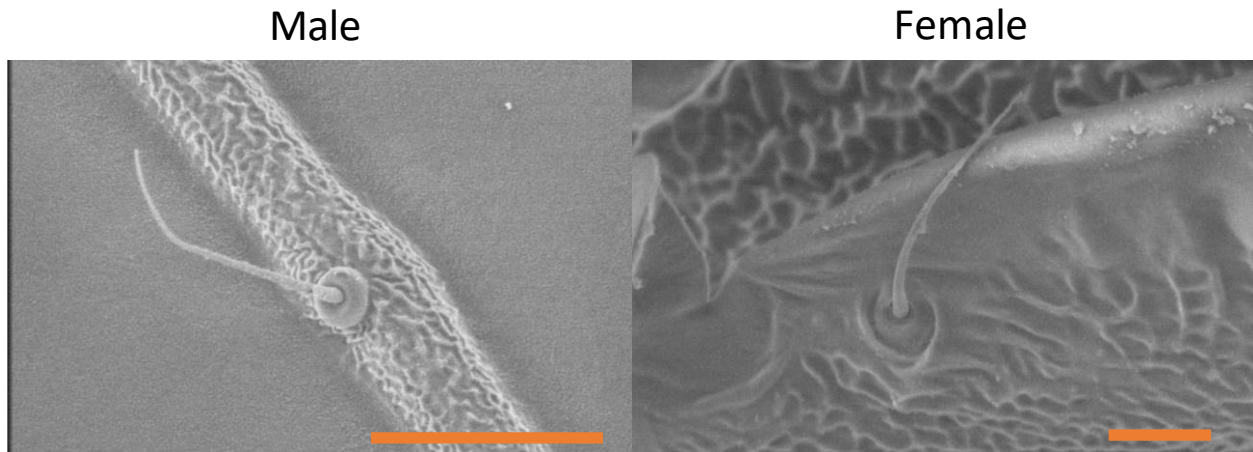

**Figure S2.** Vein and hair of male and female *Calopteryx haemorrhoidalis* wing membranes of fore- and hind-wings imaged under low vacuum SEM (Scale bar 20  $\mu\text{m}$ ).

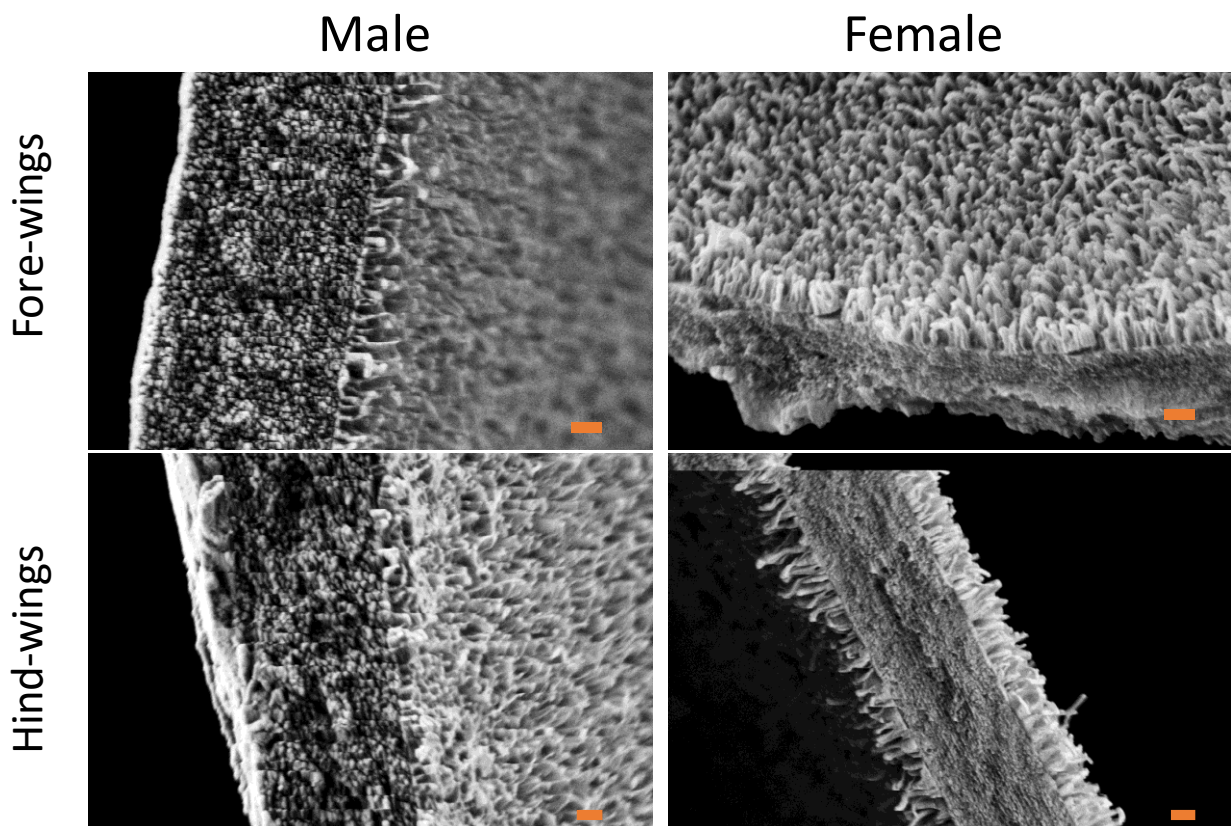

**Figure S3.** Scanning electron micrographs of the fore- and hind-wing membranes of male and female *Calopteryx haemorrhoidalis* (Scale bar 200 nm).

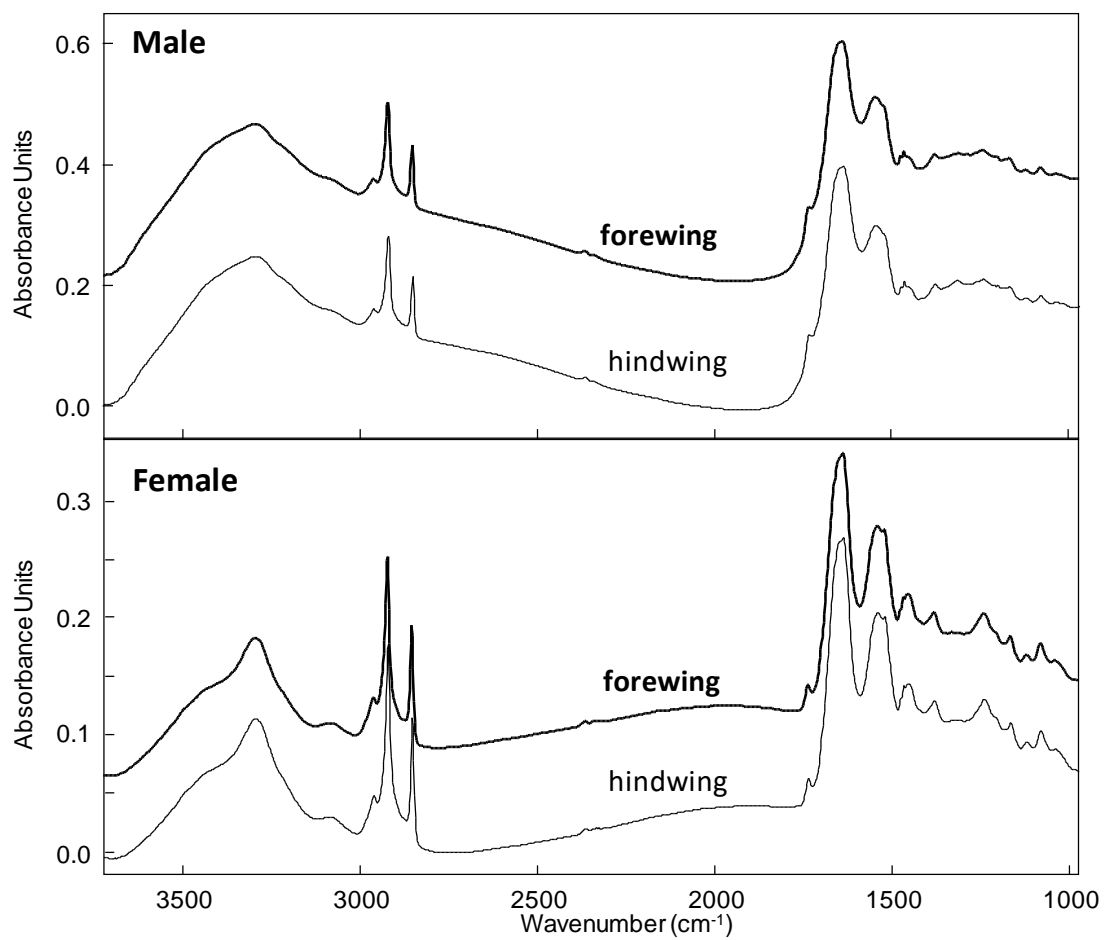

**Figure S4.** Average s-FTIR spectra obtained from the fore- and hind-wing membranes of male and female *Calopteryx haemorrhoidalis*.

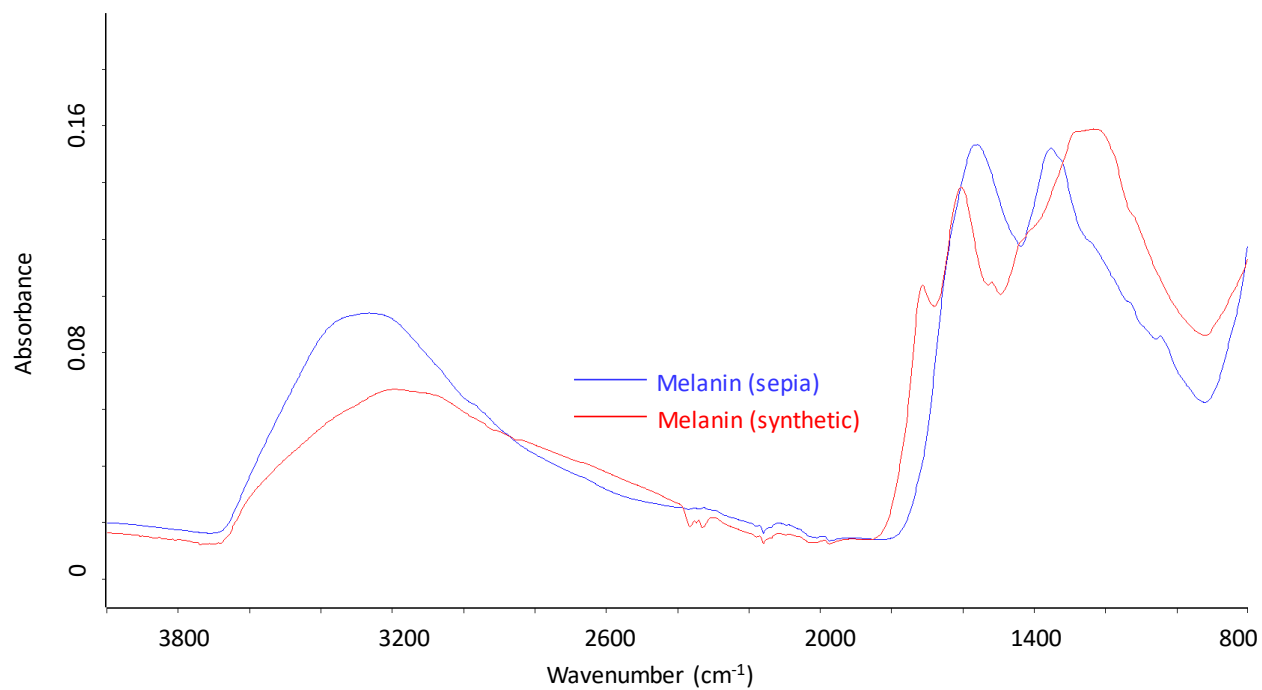

**Figure S5.** Reference ATR-FTIR spectra of the natural melanin exacted from *Sepia officinalis*, in comparison to the synthetic melanin produced by the oxidation of tyrosine with hydrogen peroxide.
